# Supplementary material for: Experimental evidence supporting a long-lived magma layer at the Martian core–mantle boundary
Source: Research Square preprint supplement (doi:10.21203/rs.3.rs-8622521/v1), 2026-01-28
Supplement: Supplementary file 1 [file 67eb3f7204bbfdb444902e44.xlsx]

## Sheet: Table 1 Starting material
	wt%	Pyrolite (1)	DWM (2)	Taylor (3)	BF97 (4)	Powder	Glass n:15
	SiO2	45.2	44.4	43.7	43.68	44.44	44.53
	TiO2	0.7	0.14	0.14	-	-	-
	Al2O3	3.5	2.9	3.04	3.13	3.1	3.28
	FeO	8.5	17.8	18.1	18.71	18.34	18.49
	MnO	0.1	0.46	0.44	-	-	-
	MgO	37.5	30.1	30.5	31.5	31.24	31.11
	CaO	3.1	2.5	2.43	2.49	2.48	2.68
	Na2O	0.6	0.5	0.53	0.5	0.4	0.31
	K2O	0.1	0.04	0.04	-	-	-
	Cr2O3	0.4	0.8	0.73	-	-	-
	Total	99.7	99.64	99.65	100.01	100	100.4
	CaO/Al2O3	0.885714	0.862069	0.799342	0.795527	0.8	0.817073
	Mg#	0.89	0.75	0.75	0.75	0.75	0.75
	Mg# = Mg/(Mg + Fe) atomic ratio
	(1) Ringwood, 1975
	(2) Dreibus and Wanke, 1985
	(3) Taylor, 2013
	(4) Bertka and Fei, 1997

## Sheet: Table 2 Ultrasonic experiments
Run	T(K)	e(T)	Pressure	e(P)	VP(km/s)	e(VP)	VS(km/s)	e(VS)	tP(ns) 70 Mhz	tS(ns) 30 Mhz	tP/tS	L(mm)	e(L)um	Reduction Vp (%)	Reduction Vs (%)
S3632	1405	15	14.6585	3	9.31161	0.1	4.88738	0.1	200.5	382	0.524869	0.933489	5
	1492	15	14.599	3	9.26866	0.1	4.85157	0.1	201	384	0.523438	0.931501	5
	1615	15	14.5825	3	9.19051	0.1	4.80954	0.1	202	386	0.523316	0.928241	5
	1739	15	14.4983	3	9.09701	0.1	4.77124	0.1	203.5	388	0.524485	0.925621	5
	1784	15	14.427	3	9.07077	0.1	4.74006	0.1	203.8	390	0.522564	0.924312	5
	1867	15	14.3295	3	9.0105	0.1	4.71318	0.1	204	390	0.523077	0.919071	5
	2000	15	14.2235	3	8.89757	0.1	4.62853	0.1	206	396	0.520202	0.916449	5
	2040	15	14.1922	3	8.84192	0.1	4.59869	0.1	207	398	0.520101	0.915139	5	0	0
	2090	15	14.1043	3	8.2837	0.1	3.79669	0.1	220	480	0.458333	0.911207	5	6.31335	17.4396
	2111	15	14.096	3	8.12642	0.1	3.60813	0.1	222	500	0.444	0.902032	5	8.09216	21.54
	2126	15	14.0702	3	7.9375	0.1	3.48935	0.1	222	505	0.439604	0.881062	5	10.2288	24.1228
	2149	15	13.9985	3	7.75011	0.1	3.35341	0.1	225	520	0.432692	0.871888	5	12.3481	27.0789
S3631	1510	15	18.873	3	9.25706	0.1	5.047	0.1	199	365	0.545205	0.921077	5
	1893	15	18.5888	3	9.21195	0.1	5.03506	0.1	200	365.912	0.54658	0.921195	5
	1911	15	18.5467	3	9.18787	0.1	5.0264	0.1	200.2	365.95	0.547069	0.919706	5
	1959	15	18.3885	3	9.1772	0.1	5.02441	0.1	200.4	366.035	0.547488	0.919555	5
	1982	15	18.3155	3	9.16302	0.1	5.01316	0.1	200.4	366.29	0.547107	0.918135	5
	2011	15	18.2613	3	9.1525	0.1	4.99766	0.1	200.6	367.37	0.546043	0.917996	5
	2041	15	18.1152	3	9.11928	0.1	4.9888	0.1	201	367.418	0.547061	0.916487	5
	2061	15	18.1148	3	9.10952	0.1	4.98605	0.1	201.2	367.592	0.547345	0.916418	5
	2082	15	18.029	3	9.09585	0.1	4.97782	0.1	201.2	367.648	0.547263	0.915043	5
	2111	15	17.9675	3	9.08475	0.1	4.97193	0.1	201.4	368	0.547283	0.914834	5
	2132	15	17.8543	3	9.08234	0.1	4.95445	0.1	201.4	369.2	0.545504	0.914592	5
	2153	15	17.813	3	9.07276	0.1	4.95414	0.1	201.6	369.2	0.546046	0.914534	5
	2183	15	17.7147	3	9.04619	0.1			201.8			0.912761	5	0	-
	2211	15	17.7017	3	8.38224	0.1			217.2			0.910311	5	7.33958	-
	2222	15	17.6315	3	8.23329	0.1			220.6			0.908643	5	8.98611	-

## Sheet: Table 3  X-ray
Run	T(K)	e(T)	Pressure	e(P)	Assemblage using X-ray		Rw	Ringwoodite
							Wad	Wadsleyite
							Ol	Olivine
S3632	1405	15	14.4885	3	Rw+Gt+CPx		Gt	Garnet
	1492	15	14.219	3	Rw+Gt+CPx		OPx	Orthopyroxene
	1615	15	14.5825	3	Rw+Wad+Gt+CPx		CPx	Clinopyroxene
	1739	15	14.4983	3	Rw+Wad+Gt+CPx
	1784	15	14.427	3	Wad+Gt+CPx
	1867	15	14.3295	3	Wad+Gt+CPx
	2000	15	14.2235	3	Wad+Gt+CPx
	2040	15	14.1922	3	Wad+Gt+CPx
	2090	15	14.1242	3	Wad+Gt+CPx
	2111	15	14.096	3	Wad+Gt+CPx+Melt?
	2126	15	14.0702	3	Wad+Gt+CPx+Melt?
	2149	15	13.9985	3	Wad+Gt+(CPx)+Melt
S3631	1510	15	18.8	3	Rw+Gt
	1810	15	18.637	3	Rw+Gt
	1893	15	18.5888	3	Rw+Gt
	1911	15	18.5467	3	Rw+Gt
	1959	15	18.3885	3	Rw+Gt
	1982	15	18.3155	3	Rw+Gt
	2011	15	18.2613	3	Rw+Gt
	2041	15	18.1152	3	Rw+Gt
	2061	15	18.1148	3	Rw+Gt
	2082	15	18.029	3	Rw+Gt
	2111	15	17.9675	3	Rw+Gt
	2132	15	17.8543	3	Rw+Gt
	2153	15	17.813	3	Rw+Gt
	2183	15	17.7548	3	Rw+Gt
	2211	15	17.7017	3	Rw+Gt+Melt?
	2222	15	17.6315	3	Rw+Gt+Melt?
S3630	1350	15	8.678	3	Ol+Gt+CPx+Opx
	1650	15	8.304	3	Ol+Gt+CPx+Opx
	1554	15	8.306	3	Ol+Gt+CPx+Opx
	1630	15	8.284	3	Ol+Gt+CPx+Opx
	1674	15	8.223	3	Ol+Gt+CPx+Opx
	1722	15	8.185	3	Ol+Gt+CPx+Opx
	1767	15	8.068	3	Ol+Gt+CPx+Opx
	1812	15	8.007	3	Ol+Gt+CPx+Opx
	1858	15	7.982	3	Ol+Gt+CPx+(Opx)
	1904	15	7.893	3	Ol+Gt+CPx+Melt?
	1930	15	7.85	3	Ol+Gt+(CPx)+Melt
	1954	15	7.825	3	Ol+Gt+Melt
S3565	1503	15	10.3	3	Ol+(Rw)+CPx+Gt
	1543	15	10.24	3	Ol+(Rw)+CPx+Gt
	1583	15	10.18	3	Ol+(Rw)+CPx+Gt
	1623	15	10.12	3	Ol+(Rw)+CPx+Gt
	1663	15	10.06	3	Ol+(Rw)+CPx+Gt
	1703	15	10	3	Ol+(Rw)+CPx+Gt
	1743	15	9.94	3	Ol+CPx+Gt
	1783	15	9.88	3	Ol+CPx+Gt
	1823	15	9.82	3	Ol+CPx+Gt
	1863	15	9.76	3	Ol+CPx+Gt
	1903	15	9.7	3	Ol+CPx+Gt
	1923	15	9.64	3	Ol+CPx+Gt
	1943	15	9.62	3	Ol+CPx+Gt
	1963	15	9.59	3	Ol+CPx+Gt+Melt?
	1983	15	9.56	3	Ol+CPx+Gt+Melt?
	2003	15	9.53	3	Ol+CPx+Gt+Melt
	2023	15	9.5	3	Ol+CPx+Gt+Melt
	2043	15	9.47	3	Ol+CPx+Gt+Melt
	2063	15	9.44	3	Ol+Gt+Melt
	2083	15	9.41	3	Ol+Gt+Melt
	2103	15	9.38	3	Ol+Gt+Melt

## Sheet: Table 4 Chemistry
		SiO2	Error	Al2O3	Error	FeO	Error	MgO	Error	CaO	Error	Total	Mode (%) pixel analysis	STD (%)	Mode (%) calculated	STD (%)	Mg num	Kd Fe/mg (Ol/melt)
																								40.3	MgO
S3630																								71.8	FeO
Cold zone	Olivine	39.94	0.24	0	0	18.63	0.22	42.86	0.59	0	0	101.43	52	2	53.24	3.08	0.803876
	Garnet	42.29	0.21	19.53	0.37	14.55	0.24	19.68	0.24	4	0.37	100.05	12	2	12.18	4.63	0.706728
	Clinopyroxene	53.08	0.14	1.1	0.61	10.2	0.94	22.47	0.63	13.62	0.93	100.47	12	2	10.41	4.96	0.796948
	Melt measured	51.61	0.6	2.98	0.5	25.6	0.8	15.9	0.8	5.2	0.6	101.29	24	2	24.17	5.11	0.525293	0.269971
	Fe 100%												< 1
Warm zone	Olivine	40.9	0.34	0	0	14.15	0.78	45.5	0.8	0	0	100.55	49	2	46.75	0.119366	0.851388
	Garnet	42.96	0.26	18.15	0.44	13.9	0.7	21.61	0.8	3.27	0.34	99.89	9	2	8.7	0.210351	0.734739
	Melt measured	49.02	0.5	3.38	0.6	23.96	0.7	18.2	0.7	5.06	0.6	99.62	42	2	44.56	0.192698	0.57507	0.236227
	Fe 100%												< 1
S3631
	Ringwoodite	38.12	0.2	0	0	23.95	0.3	38.34	0.2	0	0	100.41	48	2	48	-	0.740402
	Garnet majorite	52.33	0.2	6.61	0.3	10.8	0.2	24.69	0.3	5.1	0	99.53	47	2	47	-	0.802879
Mass balance	Melt calculated	37.37	-	1.13	-	37.63	-	21.07	-	2.8	-	100	5	2	5	-	0.499395	0.349771
	Fe 100%												< 1
S3632
	Wadsleyite	39.2	0.17	0	0	19.06	0.35	42	0.35	0	0	100.26	49	2	46.34	0.12	0.796994
	Garnet majorite	49	0.45	8.9	0.8	15.33	0.33	23.28	0.8	3.3	0.3	99.81	30	2	31.46	0.3	0.730137
	Clinopyroxene	54.8	0.59	1.1	0.8	12.12	0.53	22.9	0.64	9.1	0.8	100.02	8	2	10.7	0.24	0.770973
	Melt measured	45.7	0.7	1.9	0.8	31	0.8	17.92	0.7	4.3	0.8	100.82	13	2	11.79	0.15	0.507365	0.262331
	Fe 100%												< 1		<1
S3565
	Olivine	41.67	0.23	0	0	8.8	0.8	50.2	0.8	0	0	100.67	30	2	25.1159	0.919828	0.910422
	Garnet majorite	45.32	0.4	17.27	0.7	9.37	0.8	25.48	0.7	2.21	0	99.65	3	2	1.63062	1.48755	0.828909
	Melt measured	45.9601	0.9	3.6416	0.8	21.8508	0.8	24.8519	0.7	3.62707	0.4	99.9315	67	2	73.2535	1.511	0.669567	0.199375
MA-5	Subsolidus
	Olivine	38.28	0.31	0	0	22.2	0.31	40.58	0.4	0	0	101.06	48	2	44.16	2.40391	0.765077
	Orthopyroxene	52.14	0.42	2.71	0.5	15.82	0.24	27.6	0.33	1.65	0.09	99.92	33	2	37.56	4.46719	0.75659
	Clinopyroxene	51.64	0.9	2.95	0.75	11.35	0.7	18.06	0.8	17.28	0.6	101.28	8	2	8.15	2.63109	0.739239
	Grenat	41.56	0.3	19.44	0.4	16.2	0.5	18.3	0.5	4.8	0.3	100.3	11	2	10.12	2.22459	0.66806
MA-14	Subsolidus
	Wadsleyite	38.4	0.22	0	0	20.48	0.67	41.94	0.9	0	0	100.82	48	2	47.62	3.78739	0.784878
	Garnet majorite	48.15	0.57	10	0.43	15.53	0.86	22.53	0.8	3.7	0.4	99.91	30	2	31.69	9.18199	0.721036
	Clinopyroxene	54.08	0.48	1.5	0.44	13.1	0.44	21.05	0.8	10.44	0.8	100.17	21	2	19.46	7.5737	0.741124
	Magnesio-wüstite	1.95	0.3	0	0	66	0.8	32.61	0.8	0	0	100.56	1	2	1.23	1.05408	0.468167
	Fe 100%												<1		<1
MA-17	Subsolidus
	Ringwoodite	37.75	0.3	0	0	24.54	0.3	37.2	0.3	0	0	99.49	51	2	52.69	0.69	0.729786
	Garnet majorite	51.52	0.3	6.8	0.4	11.23	0.3	24.51	0.3	5.2	0.4	99.26	49	2	47.31	0.69	0.795439
	Fe 100%												<1		<1

## Sheet: Table 5 Solidus and Quench 
	Conditions where the Solidus was measured
	Run	Technique	Pressure (GPa)	Uncertainty P (GPa)	Nominal T (K)	Uncertainty P (K)	ΔT Gradient from TC	Final T (K) Corrected
	S3630	X-ray	7.95	0.3	1840	15	50	1890
	S3631	US + X-ray	17.7	0.3	2090	15	110	2200
	S3632	US + X-ray	14.1	0.3	1980	15	110	2090
	S3565	X-ray	9.6	0.3	1910	15	50	1960
	H5898	Ex situ	18	0.5	2273	15	-50	2223
	Quenched conditions
	Run	Purpose	Pressure (GPa)	Uncertainty P (GPa)	Nominal T (K)	Uncertainty T (K)	ΔT Gradient from TC	Final T (K) Corrected
	S3530	Melting In situ	7.8	0.3	1960	15	50	2010
	S3531	Melting In situ	17.63	0.3	2112	15	110	2222
	S3532	Melting In situ	13.99	0.3	2040	15	110	2150
	S3565	Melting In situ	9.35	0.3	2070	15	50	2120
	H5897	Melting Ex situ	18	0.3	2273	15	-50	2223
	H5898	Melting Ex situ	18	0.3	2173	15	50	2223
	MA-5	Synthesis	5	0.5	1400	15	-	-
	MA-14	Synthesis	14	0.5	1600	15	-	-
	MA-17	Synthesis	17	0.5	1600	15	-	-
	US	Ultrasonic

## Sheet: Table 6 Density
			Rho	Rho	Rho
			Asimow model 1	Wakabayashi	Ohtani			Melt Composition (wt%)			Mole
P(Gpa)	T(K)							Fe-50				Molar mass	Mass	Mass_Norm
								2.8	CaO		1	0.0560774	0.0560774	23.4891
0	1800		-	3219.79	2773.13			21.07	MgO		0.64	0.0403044	0.0257948	10.8047
1	1834.05		-	3246.13	2855.17			1.13	Al2O3		0.36	0.10196	0.0367056	15.3749
2	1866.42		-	3272.32	2930.97			37.63	SiO2		2	0.06008	0.12016	50.3314
3	1897.19		-	3298.36	3001.19			37.37	FeO		0	0.071844	0	0
4	1926.42		3209.4	3324.24	3066.41								0.238738	100
5	1954.18		3246.77	3349.96	3127.14			100
6	1980.54		3283.43	3375.52	3183.83
7	2005.57		3319.4	3400.91	3236.91			Contents (mole)		Di	An	Fa	Fo	En
8	2029.31		3354.69	3426.13	3286.73			Model endmember		0.388482	0.110828	2.60077	2.17531	0.488609
9	2051.84		3389.31	3451.18	3333.66			Molar Mass		0.216542	0.278197	0.203768	0.140689	0.100384
10	2073.21		3423.27	3476.04	3377.99
11	2093.49		3456.6	3500.72	3420.02
12	2112.72		3489.29	3525.22	3460
13	2130.97		3521.37	3549.52	3498.2
14	2148.28		3552.84	3573.64	3534.83
15	2164.72		3583.72	3597.57	3570.09
16	2180.33		3614.01	3621.3	3604.18
17	2195.16		3643.74	3644.83	3637.26
18	2209.27		3672.91	3668.16	3669.5
19	2222.68		3701.53	3691.29	3701.02
20	2235.47		3729.61	3714.22	3731.94
